# Supplementary material for: Enhancing the Photocatalytic Performance of BiVO4 for Micropollutant Degradation by Fe and Ag Photomodification
Source: MDPI journal article supplement (doi:10.3390/pr11092803), 2023-09-21
Supplement: s1 [file s1]

## SUPPLEMENTARY MATERIAL

# Enhancing the Photocatalytic Performance of BiVO<sub>4</sub> for Micropollutant Degradation by Fe and Ag Photomodification

Marin Popović <sup>1</sup>, Tayebah Sharifi <sup>2,3</sup>, Marijana Kraljić Roković <sup>2</sup>, Boštjan Genorio <sup>4</sup>, Boštjan Žener <sup>4</sup>, Igor Peternel <sup>1</sup>, Urška Lavrenčič Štanger <sup>4</sup>, Hrvoje Kušić <sup>2,5,\*</sup>, Ana Lončarić Božić <sup>2</sup> and Marin Kovačić <sup>2,\*</sup>

<sup>1</sup> Department of Safety and Protection, Karlovac University of Applied Sciences, Trg Josipa Juraja Strossmayera 9, HR-47000 Karlovac, Croatia; m210p90@gmail.com (M.P.); ipeternel@vuka.hr (I.P.)

<sup>2</sup> Faculty of Chemical Engineering and Technology, University of Zagreb, Trg Marka Marulića 19, HR-10000 Zagreb, Croatia; tayebah.sharifi@ijs.si (T.S.); mkralj@fkit.unizg.hr (M.K.R.); abozic@fkit.unizg.hr (A.L.B.)

<sup>3</sup> Jožef Stefan Institute, Jamova cesta 39, SI-1000 Ljubljana, Slovenia

<sup>4</sup> Faculty of Chemistry and Chemical Technology, University of Ljubljana, Večna pot 113, SI-1000 Ljubljana, Slovenia; bostjan.genorio@fkkt.uni-lj.si (B.G.); bostjan.zener@fkkt.uni-lj.si (B.Ž.); urska.lavrencic.stanger@fkkt.uni-lj.si (U.L.Š.)

<sup>5</sup> University Center Koprivnica, University North, Trg dr. Žarka Dolinara 1, HR-48000 Koprivnica, Croatia

\* Correspondence: hkusic@fkit.unizg.hr (H.K.); mkovacic@fkit.unizg.hr (M.K.); Tel.: +385-1-4597-160 (H.K.); +385-1-4597-145 (M.K.)

**Contents:**

Tables .....1

Figures.....3

## Tables

**Table S1.** Full factorial design with coded variables ( $X$ ) corresponding to experimental variables, i.e., pH and wt% of  $\text{Fe}^{2+}$  using during photomodification (Fe@BVO), and  $\text{Ag}^+$  wt% for Ag-modified  $\text{BiVO}_4$  (Ag@BVO) investigated for the photocatalytic degradation of CIP:

| $X_1$ | $X_2$ | pH | wt% Fe | wt % Ag |
|-------|-------|----|--------|---------|
| -1    | -1    | 4  | 5      | 1       |
| 0     | -1    | 6  | 5      | 1       |
| 1     | -1    | 8  | 5      | 1       |
| -1    | 0     | 4  | 27.5   | 8       |
| 0     | 0     | 6  | 27.5   | 8       |
| 0     | 0     | 6  | 27.5   | 8       |
| 0     | 0     | 6  | 27.5   | 8       |
| 1     | 0     | 8  | 27.5   | 8       |
| -1    | 1     | 4  | 50     | 15      |
| 0     | 1     | 6  | 50     | 15      |
| 1     | 1     | 8  | 50     | 15      |

**Table S2.** Analysis of variance for the model for CIP removal using Fe@BVO under simulated solar irradiation:

| Source   | $F$ value | $p$ value |
|----------|-----------|-----------|
| Model    | 57.88     | <0.0001   |
| $X_1$    | 262.94    | <0.0001   |
| $X_2$    | 1.04      | 0.3471    |
| $X_1X_2$ | 0.67      | 0.4436    |
| $X_1^2$  | 21.32     | 0.0036    |
| $X_2^2$  | 10.77     | 0.01682,  |

**Table S3.** Analysis of variance for the model for CIP removal using Ag@BVO under simulated 7 solar irradiation:

| Source   | $F$ value | $p$ value |
|----------|-----------|-----------|
| Model    | 102.58    | <0.0001   |
| $X_1$    | 487.53    | <0.0001   |
| $X_2$    | 24.73     | 0.0025    |
| $X_1X_2$ | 0.009     | 0.9258    |
| $X_1^2$  | 0.51      | 0.5012    |
| $X_2^2$  | 0.003     | 0.9549    |

**Table S4.** Analysis of variance (ANOVA) of the model for the removal of CIP with Ag@BVO:

| X <sub>1</sub> | X <sub>2</sub> | X <sub>3</sub> | pH | wt % Ag | wt% Fe |
|----------------|----------------|----------------|----|---------|--------|
| -1             | -1             | -1             | 4  | 1       | 5      |
| 0              | -1             | -1             | 6  | 1       | 5      |
| 1              | -1             | -1             | 8  | 1       | 5      |
| -1             | 0              | 0              | 4  | 8       | 27.5   |
| 0              | 0              | 0              | 6  | 8       | 27.5   |
| 0              | 0              | 0              | 6  | 8       | 27.5   |
| 0              | 0              | 0              | 6  | 8       | 27.5   |
| 1              | 0              | 0              | 8  | 8       | 27.5   |
| -1             | 1              | 1              | 4  | 15      | 50     |
| 0              | 1              | 1              | 6  | 15      | 50     |
| 1              | 1              | 1              | 8  | 15      | 50     |

**Table S5.** Charge transfer resistance ( $R_{ct}$ ) obtained by fitting the measured EIS data to a model equivalent electrical circuit shown on Figure S8; D depicts measurements in the dark and L depicts measurements performed under illumination:

| Photoelectrode | $R_{ct} \times 10^4 (\Omega \text{ cm}^{-2})$ | $\chi^2 \times 10^{-3}$ |
|----------------|-----------------------------------------------|-------------------------|
| D-BVO          | 40.80                                         | 0.57                    |
| L-BVO          | 8.40                                          | 2.22                    |
| D-1% Ag@BVO    | 75.12                                         | 0.77                    |
| L-1% Ag@BVO    | 1.56                                          | 1.68                    |
| D-8% Ag@BVO    | 28.10                                         | 0.88                    |
| L-8% Ag@BVO    | 1.61                                          | 1.78                    |
| D-15% Ag@BVO   | 39.50                                         | 0.9                     |
| L-15% Ag@BVO   | 1.02                                          | 3.19                    |
| D-5% Fe@BVO    | 15.25                                         | 1.12                    |
| L-5% Fe@BVO    | 3.73                                          | 2.97                    |
| D-27.5% Fe@BVO | 31.85                                         | 0.81                    |
| L-27.5% Fe@BVO | 2.60                                          | 2.32                    |
| D-50% Fe@BVO   | 7.66                                          | 1.55                    |
| L-50% Fe@BVO   | 2.30                                          | 2.55                    |

## Figures

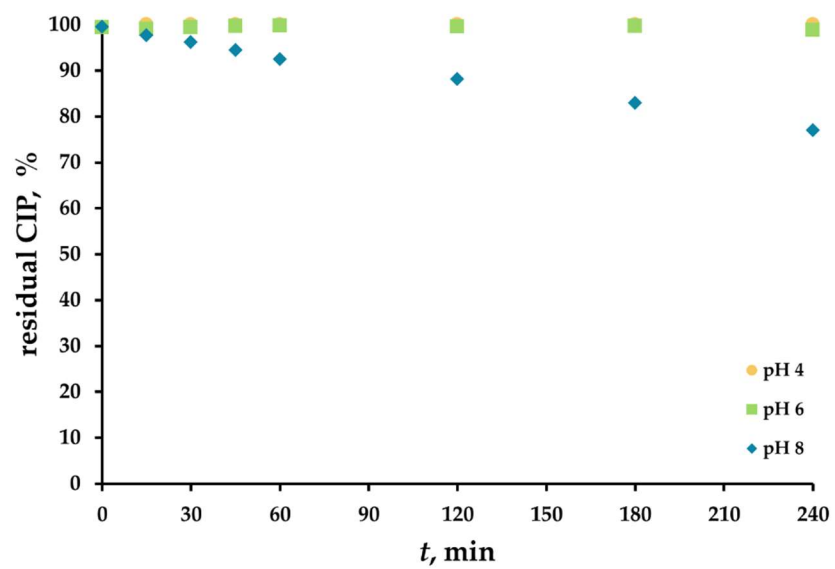

**Figure S1.** Extent of CIP photolysis under simulated solar irradiation at pH 4, pH 6 and pH 8.

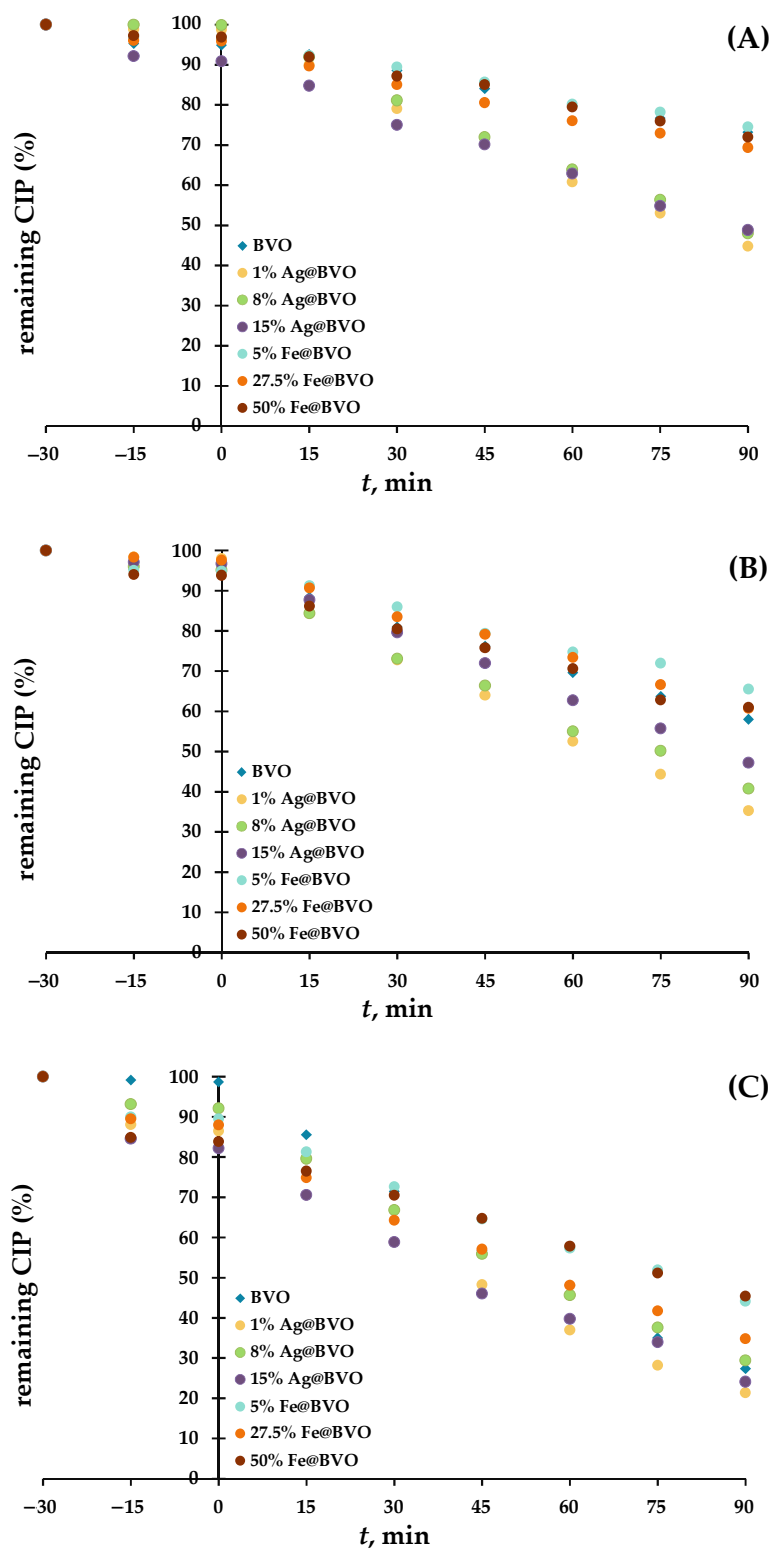

**Figure S2.** CIP remaining in solution during photocatalytic degradation (0 to 90 min) with BVO, Fe@BVO (5%, 27.5% and 50% wt. Fe) and Ag@BVO (1%, 8%, 15% wt. Ag), including the initial removal in the dark (from -30 to 0 min) at (A) pH 4, (B) pH 6 and (C) pH 8.

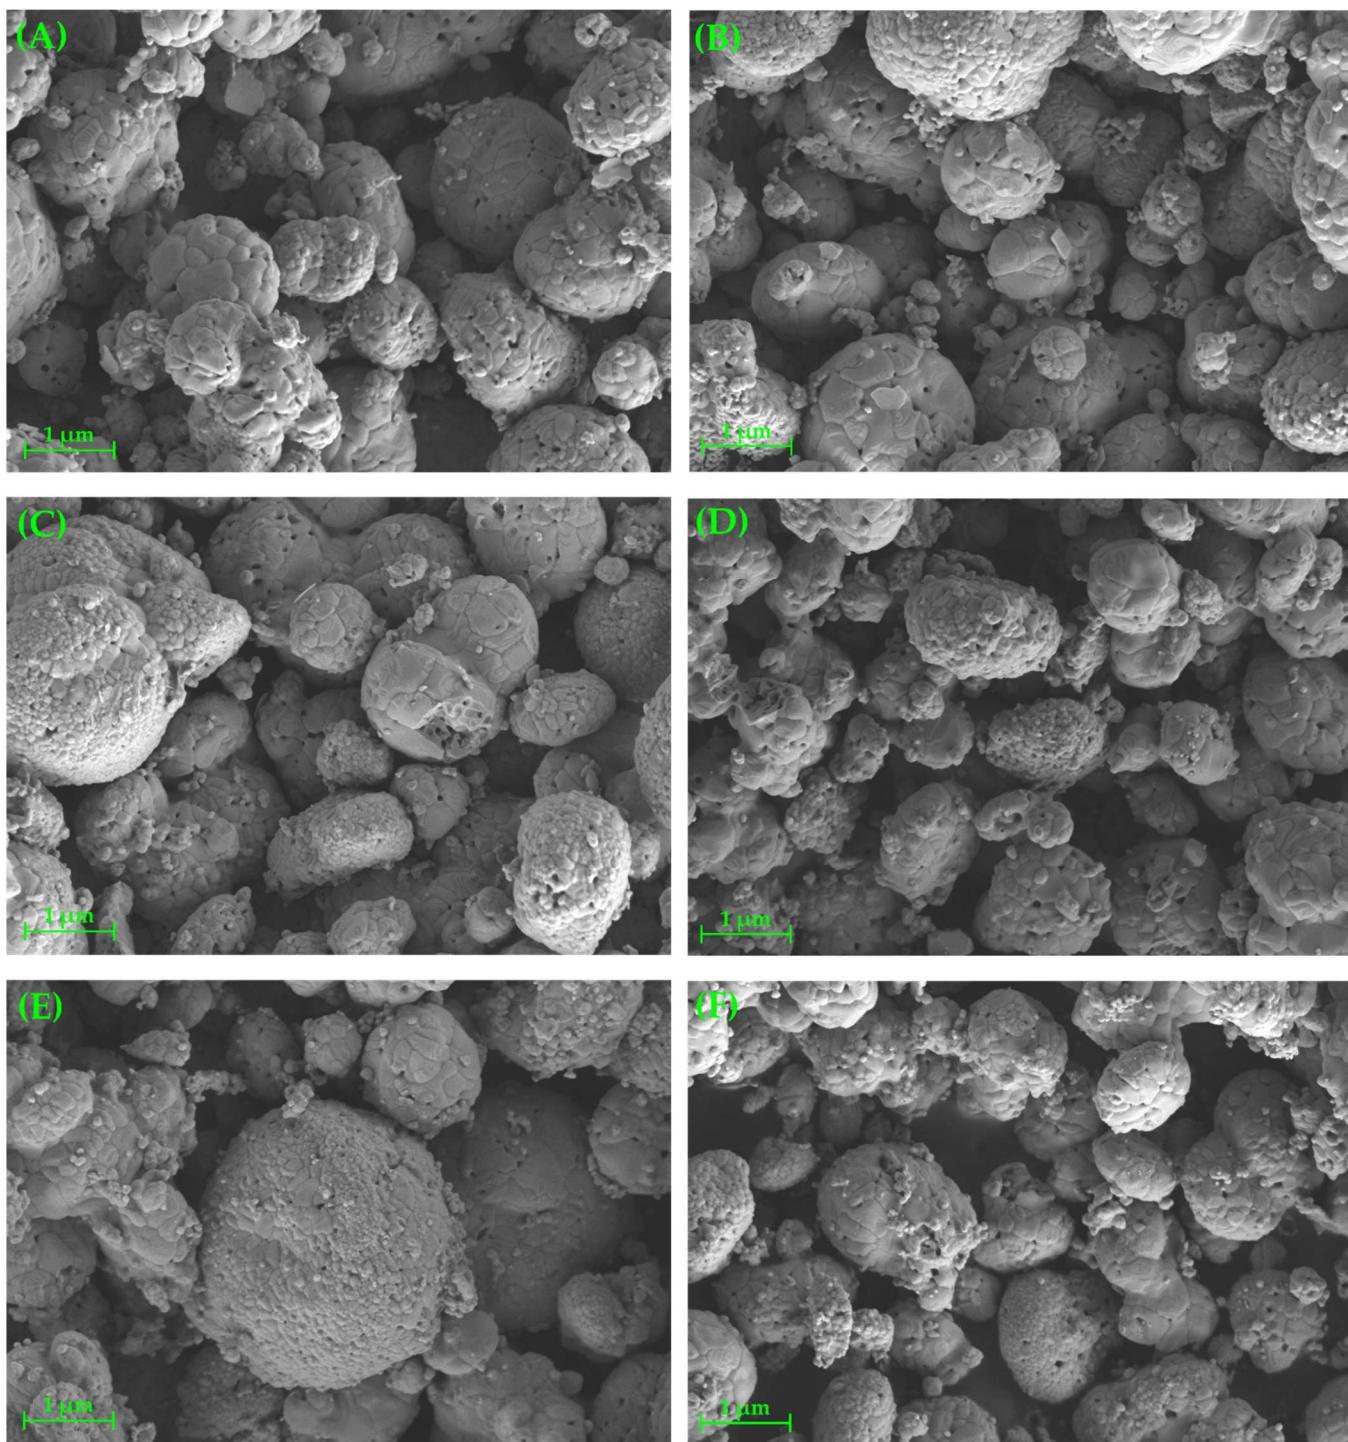

**Figure S3.** FE-SEM micrographs of Fe@BVO: (A) 5% wt. Ag, (B) 27.5% wt. Fe, (C) 50% wt. Fe; and Ag@BVO: (D) 1% wt. Ag, (E) 8% wt. Ag, (F) 15% wt. Ag.

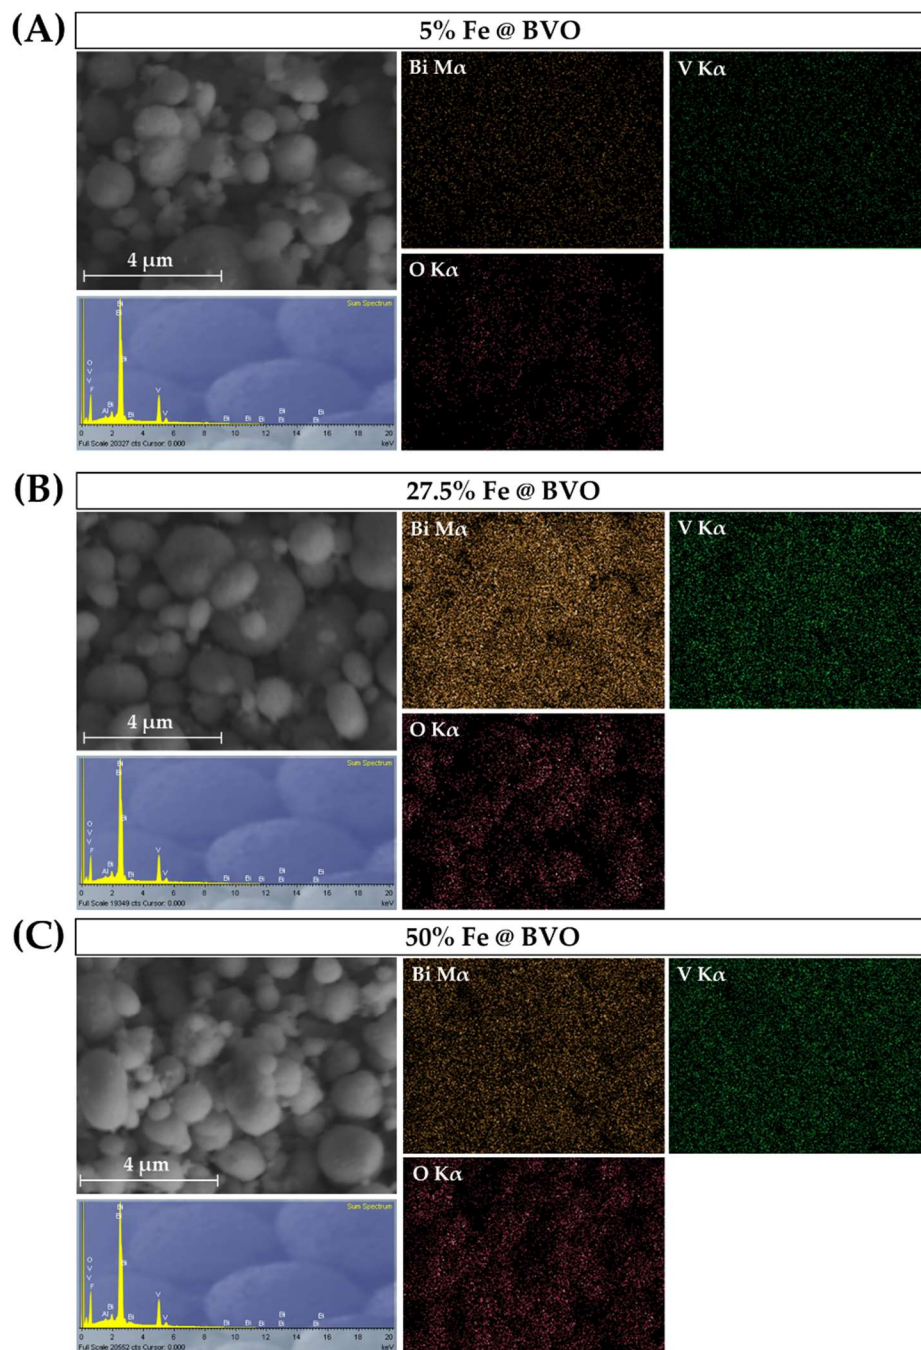

**Figure S4.** Energy dispersive X-ray (EDS) spectra of Fe@BVO samples, namely: (A) 5% wt. Fe, (B) 27.5% wt. Fe, (C) 50% wt. Fe content during photodeposition.



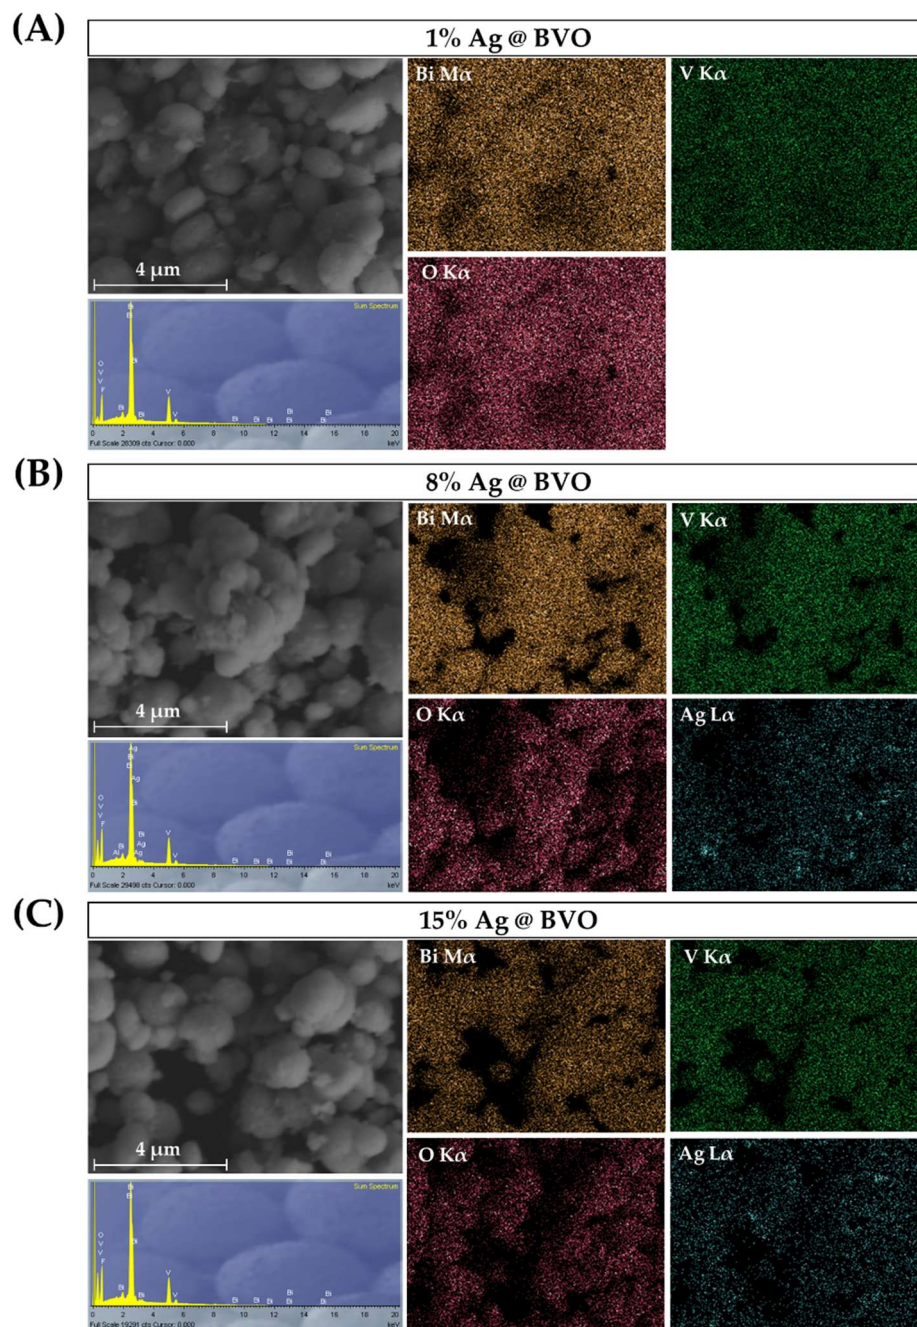

**Figure S5.** Energy dispersive X-ray spectra (EDS) of Ag@BVO samples including sum spectra for: (A) 1% wt. Ag, (B) 8% wt. Ag, (C) 15% wt. Ag loading on BiVO<sub>4</sub>.

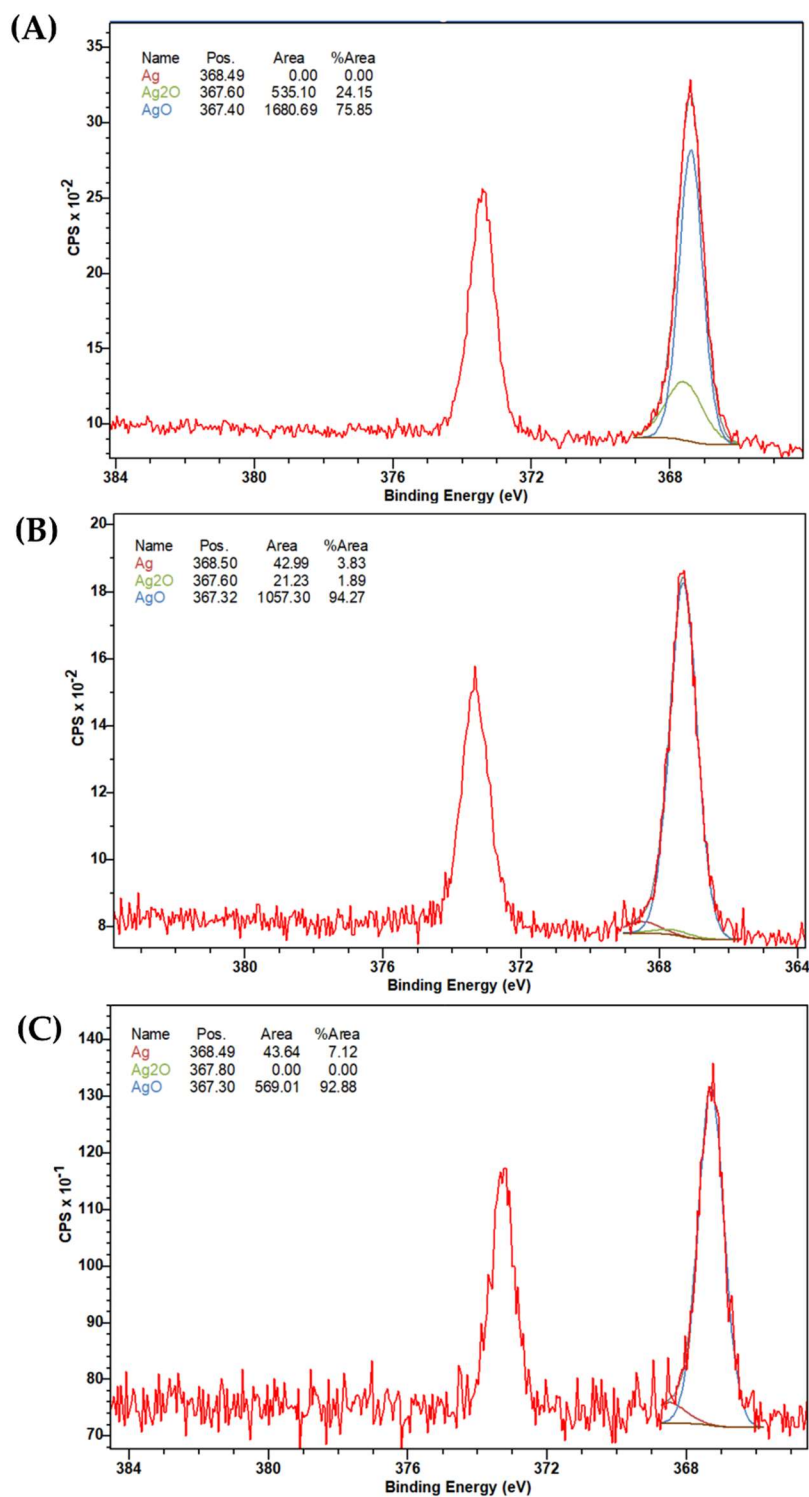

**Figure S6.** Deconvoluted X-ray photoelectron spectra (XPS) of Ag@BVO samples: (A) 1% Ag@BVO, (B) 8% Ag@BVO, (C) 15% Ag@BVO

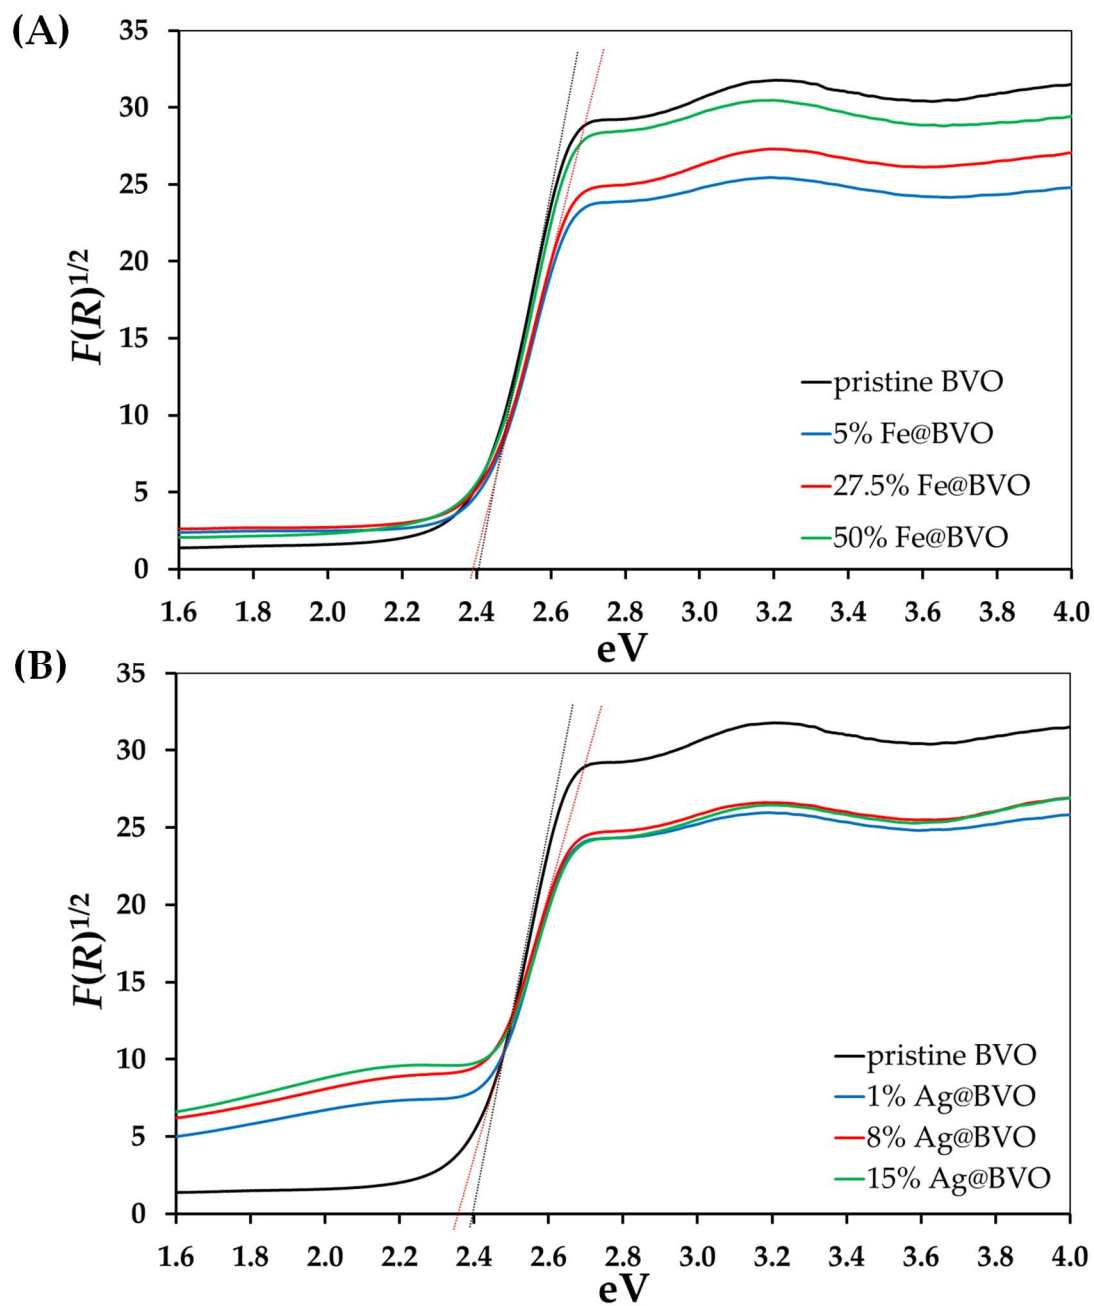

**Figure S7.** Diffuse reflectance spectra of (A) Fe@BVO and (B) Ag@BVO samples.

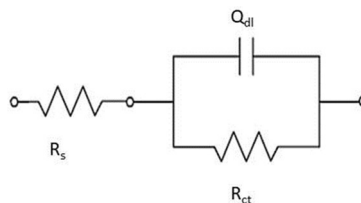

**Figure S8.** Model equivalent circuit used to fit EIS data.  $R_s$  represents the solution resistance,  $R_{ct}$  charge transfer resistance and  $Q_{dl}$  is a constant phase element related to the double layer capacitance.

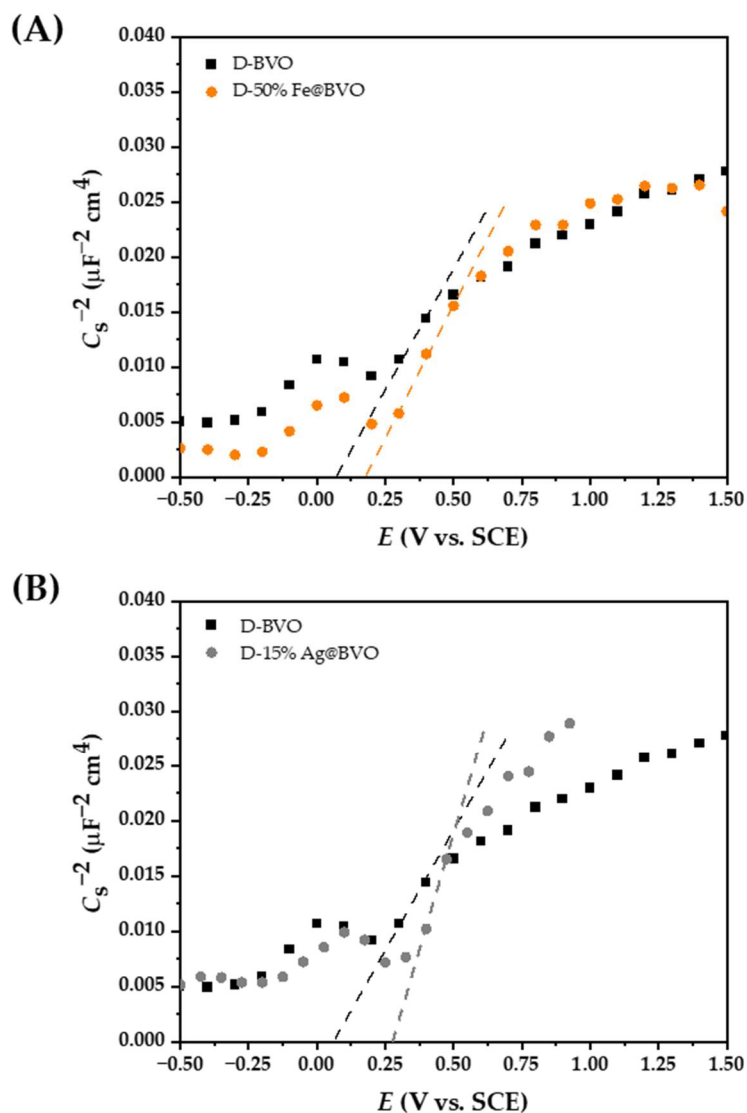

**Figure S9.** Mott-Schottky analysis of (A) 50% Fe@BVO and (B) 15% Ag@BVO.

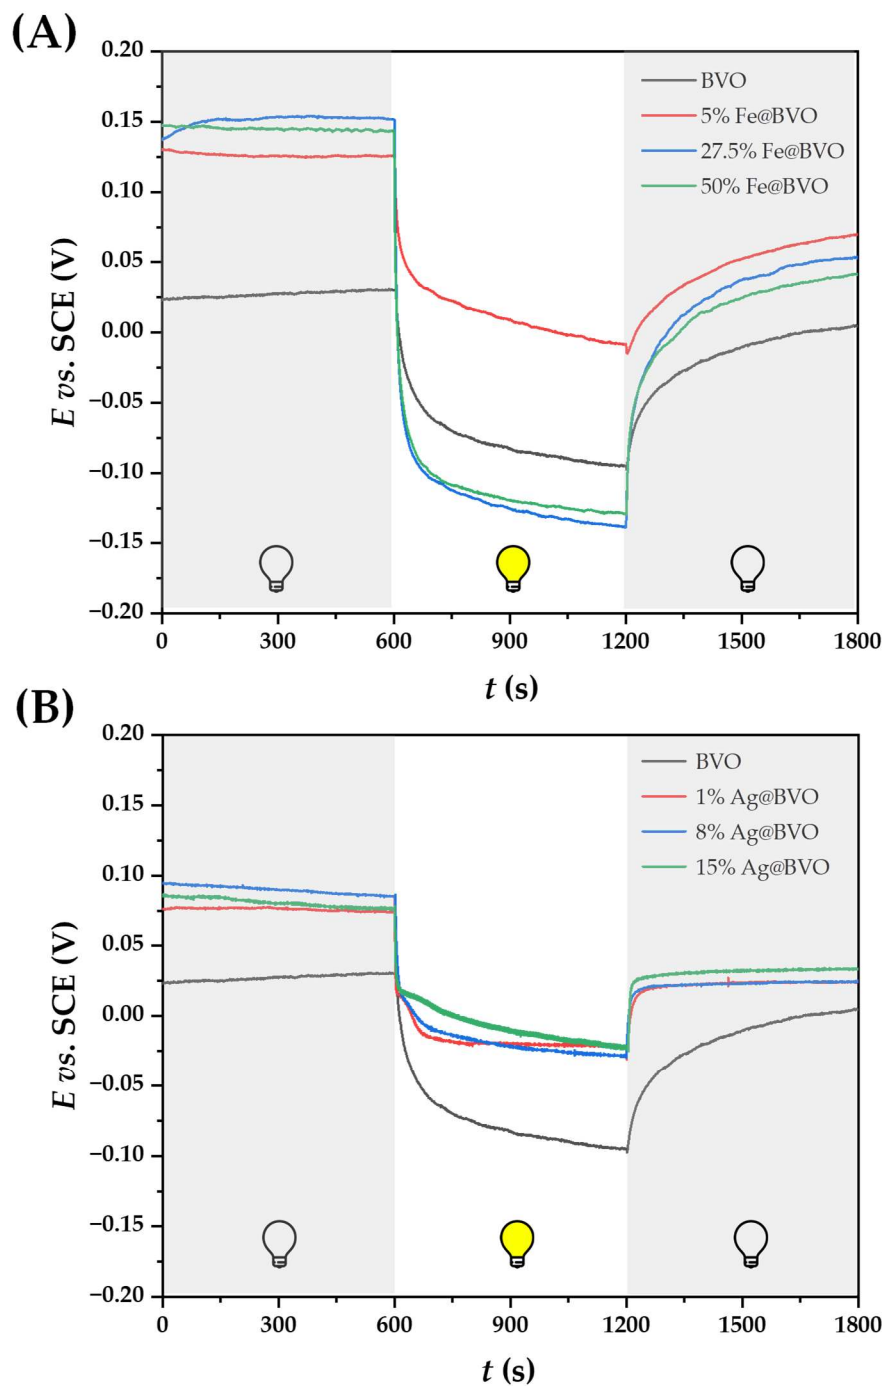

**Figure S10.** Open circuit potential (OCP) of (A) BVO and Fe@BVO photoelectrodes, (B) BVO and Ag@BVO photoelectrodes measured in the dark and under illumination.
